# Supplementary material for: Interaction between the PNPLA3 Gene and Nutritional Factors on NAFLD Development: The Korean Genome and Epidemiology Study
Source: MDPI journal article supplement (doi:10.3390/nu15010152), 2022-12-28
Supplement: s1 [file s1]

# *Supplementary Appendix for*

## Interaction between PNPLA3 gene and Nutritional factors on NAFLD development: the Korean Genome and Epidemiology Study (KoGES)

Coauthored by Sooyeon Oh, Jooho Lee<sup>\*</sup>, Sukyung Chun, Ja-Eun Choi, Mi Na Kim, Young Eun Chon, Yeonjung Ha, Seong-Gyu Hwang, Sang-Woon Choi and Kyung-Won Hong<sup>\*</sup>

### **\*Correspondence:**

**Jooho Lee, M.D., Ph. D.** (E-mail: [ljh0505@cha.ac.kr](mailto:ljh0505@cha.ac.kr)),

**Kyung-Won Hong, Ph. D.** ( Email: [kyungwon.hong@theragenbio.com](mailto:kyungwon.hong@theragenbio.com))

**Supplementary Table S1. Recommended daily intake of each nutrient according to the 2020 Korean Dietary Reference Intakes**

| <b>Nutrients</b>    | <b>Median value</b> |
|---------------------|---------------------|
| <b>Energy</b>       | 2000 kcal           |
| <b>Carbohydrate</b> | 250 g               |
| <b>Protein</b>      | 55 g                |
| <b>Fat</b>          | 25 g                |
| <b>Sodium</b>       | 2000 mg             |
| <b>Potassium</b>    | 3500 mg             |
| <b>Calcium</b>      | 700 mg              |
| <b>Phosphorus</b>   | 700 mg              |
| <b>Zinc</b>         | 8 ug                |
| <b>Iron</b>         | 15 mg               |
| <b>Vit.A</b>        | 700 R.E             |
| <b>Carotene</b>     | 1800 ug             |
| <b>Vit.B1</b>       | 1.4 mg              |
| <b>Vit.B2</b>       | 1.4 mg              |
| <b>Niacin</b>       | 15 mg               |
| <b>Vit.B6</b>       | 1.4 mg              |
| <b>Folate</b>       | 400 ug              |
| <b>Vit.C</b>        | 100 mg              |
| <b>Vit.E</b>        | 12 mg               |
| <b>Ash</b>          | 20 mg               |
| <b>Cholesterol</b>  | 300 mg              |

Ministry of Health & Welfare's research project, 2020 Korean Dietary Reference Intakes, [http://www.kns.or.kr/News/Notice\\_view.asp?mode=mod&restring=%252FNews%252FNotice.asp%253Fsearch%253D0%253D%253Dxrow%253D10%253D%253Dpage%253D1&idx=864&page=1&xsearch=1&cn\\_search=](http://www.kns.or.kr/News/Notice_view.asp?mode=mod&restring=%252FNews%252FNotice.asp%253Fsearch%253D0%253D%253Dxrow%253D10%253D%253Dpage%253D1&idx=864&page=1&xsearch=1&cn_search=)

**Supplementary Table S2. Genetic risk of *the PNPLA3* rs738409 *G* allele for non-alcoholic fatty liver disease (NAFLD) occurrence in genome-wide association studies (GWAS) analyses**

|                               | Additive model   |                        | Dominant model   |                       | Recessive model  |                       |
|-------------------------------|------------------|------------------------|------------------|-----------------------|------------------|-----------------------|
|                               | OR (95% CI)      | <i>P</i> - value       | OR (95% CI)      | <i>P</i> - value      | OR (95% CI)      | <i>P</i> - value      |
| <i>PNPLA3</i> rs738409 allele |                  |                        |                  |                       |                  |                       |
| <i>C</i> allele               | 1                |                        | 1                |                       | 1                |                       |
| <i>G</i> allele               | 1.22 (1.15~1.30) | 1.96×10 <sup>-10</sup> | 1.27 (1.15~1.39) | 1.24×10 <sup>-6</sup> | 1.36 (1.22~1.52) | 1.82×10 <sup>-8</sup> |

Abbreviations: NAFLD, non-alcoholic fatty liver disease; 95% CI, 95% confidence interval; OR, odds ratio; GWAS, Genome-wide association studies

; *PNPLA3*, patatin-like phospholipase domain-containing 3

**Supplementary Table S3. Proportion of patients with \*high intake of each nutrient**

|              | <b>Total population<br/>(n=15,725)</b> | <b>NALFD<br/>(n=2923)</b> | <b>Control<br/>(n=12802)</b> | <b><i>p</i>-value</b> |
|--------------|----------------------------------------|---------------------------|------------------------------|-----------------------|
| Energy       | 29.31                                  | 26.89                     | 29.86                        | 0.002                 |
| Carbohydrate | 79.28                                  | 80.53                     | 79.00                        | 0.067                 |
| Protein      | 53.21                                  | 47.76                     | 54.45                        | <0.001                |
| Fat          | 54.07                                  | 44.27                     | 56.31                        | <0.001                |
| Sodium       | 59.84                                  | 57.41                     | 60.4                         | 0.003                 |
| Potassium    | 9.96                                   | 9.75                      | 10.01                        | 0.7                   |
| Calcium      | 11.83                                  | 12.08                     | 11.78                        | 0.67                  |
| Phosphorus   | 71.88                                  | 69.14                     | 72.5                         | <0.001                |
| Zinc         | 42.38                                  | 40.71                     | 42.77                        | 0.04                  |
| Iron         | 11.46                                  | 11.7                      | 11.40                        | 0.67                  |
| Vitamin A    | 16.87                                  | 16.87                     | 16.87                        | 1                     |
| Carotene     | 54.52                                  | 52.93                     | 54.88                        | 0.057                 |
| Vitamin B1   | 15.75                                  | 13.1                      | 16.36                        | <0.001                |
| Vitamin B2   | 11.4                                   | 10.33                     | 11.65                        | 0.047                 |
| Niacin       | 41.69                                  | 35.99                     | 42.99                        | <0.001                |
| Vitamin B6   | 56.58                                  | 53.13                     | 57.37                        | <0.001                |
| Folate       | 6.54                                   | 7.15                      | 6.41                         | 0.15                  |
| Vitamin C    | 43.56                                  | 43.28                     | 43.63                        | 0.74                  |
| Vitamin E    | 14.4                                   | 13.51                     | 14.61                        | 0.13                  |
| Ash          | 16.93                                  | 16.8                      | 16.96                        | 0.86                  |
| Cholesterol  | 13.14                                  | 12.04                     | 13.4                         | 0.054                 |

Values are presented as percent (%).

\*For each nutrient, a daily intake above the recommended daily value was defined as high intake and below as low intake. The recommended daily values used in this study are presented in Supplementary Table S1.

**Supplementary Table S4. non-alcoholic fatty liver disease (NAFLD) case frequencies by nutrient consumption level in the \*PNPLA3 risk group (rs738409 GG + GC) (n = 10,530) determined by univariate analyses**

| Nutrient        | High intake** |             |                         | Low intake** |             |                         | OR    | P-value |
|-----------------|---------------|-------------|-------------------------|--------------|-------------|-------------------------|-------|---------|
|                 | NAFLD (n)     | Control (n) | Proportion of NAFLD (%) | NAFLD (n)    | Control (n) | Proportion of NAFLD (%) |       |         |
| Energy(kcal)    | 556           | 2532        | 18.01%                  | 1536         | 5906        | 20.64%                  | 0.946 | 0.381   |
| Protein(g)      | 982           | 4579        | 17.66%                  | 1110         | 3859        | 22.34%                  | 0.821 | 0.001   |
| Fat(g)          | 913           | 4746        | 16.13%                  | 1179         | 3692        | 24.20%                  | 0.755 | <0.0001 |
| Carbohydrate(g) | 1689          | 6634        | 20.29%                  | 403          | 1804        | 18.26%                  | 1.037 | 0.617   |
| Ca(mg)          | 245           | 965         | 20.25%                  | 1847         | 7473        | 19.82%                  | 0.997 | 0.972   |
| P(mg)           | 1418          | 6084        | 18.90%                  | 674          | 2354        | 22.26%                  | 0.851 | 0.009   |
| Fe(mg)          | 232           | 962         | 19.43%                  | 1860         | 7476        | 19.92%                  | 0.98  | 0.817   |
| K(mg)           | 202           | 817         | 19.82%                  | 1890         | 7621        | 19.87%                  | 0.991 | 0.922   |
| Vit.A (R.E.)    | 338           | 1416        | 19.27%                  | 1754         | 7022        | 19.99%                  | 0.905 | 0.19    |
| Sodium (mg)     | 1161          | 5119        | 18.49%                  | 931          | 3319        | 21.91%                  | 0.771 | <0.0001 |
| Vit.B1(mg)      | 264           | 1372        | 16.14%                  | 1828         | 7066        | 20.55%                  | 0.881 | 0.122   |
| Vit.B2(mg)      | 214           | 962         | 18.20%                  | 1878         | 7476        | 20.08%                  | 0.959 | 0.649   |
| Niacin(mg)      | 740           | 3630        | 16.93%                  | 1352         | 4808        | 21.95%                  | 0.8   | <0.0001 |
| Vit.C(mg)       | 907           | 3684        | 19.76%                  | 1185         | 4754        | 19.95%                  | 0.97  | 0.594   |
| Zinc(ug)        | 844           | 3591        | 19.03%                  | 1248         | 4847        | 20.48%                  | 0.948 | 0.354   |
| Vit.B6(mg)      | 1101          | 4842        | 18.53%                  | 991          | 3596        | 21.60%                  | 0.823 | 0.001   |
| Folate(ug)      | 135           | 527         | 20.39%                  | 1957         | 7911        | 19.83%                  | 0.961 | 0.73    |
| Carotene(ug)    | 1092          | 4622        | 19.11%                  | 1000         | 3816        | 20.76%                  | 0.878 | 0.022   |
| Ash(mg)         | 335           | 1421        | 19.08%                  | 1757         | 7017        | 20.03%                  | 0.833 | 0.017   |
| Vit.E(mg)       | 278           | 1213        | 18.65%                  | 1814         | 7225        | 20.07%                  | 1.016 | 0.849   |
| Cholesterol(mg) | 241           | 1110        | 17.84%                  | 1851         | 7328        | 20.17%                  | 1.012 | 0.892   |

Abbreviations: NAFLD, non-alcoholic fatty liver disease; OR, odds ratio

\*In the *PNPLA3* risk group, The proportion of NAFLD patients was 19.87% (2,092/10,530).

\*\* For each nutrient, daily intake above the recommended daily value was defined as high intake and below that as low intake. The recommended daily values used in this study are presented in Supplementary Table S1.

**Supplementary Table S5. Non-alcoholic fatty liver disease (NAFLD) case frequencies by nutrient consumption level in the \*PNPLA3 non-risk group (rs738409 CC) (n = 5,195) determined by univariate analyses**

| Nutrient        | High intake** |             |                         | Low intake** |             |                         | OR    | P-value |
|-----------------|---------------|-------------|-------------------------|--------------|-------------|-------------------------|-------|---------|
|                 | NAFLD (n)     | Control (n) | Proportion of NAFLD (%) | NAFLD (n)    | Control (n) | Proportion of NAFLD (%) |       |         |
| Energy(kcal)    | 230           | 1291        | 15.12%                  | 601          | 3073        | 16.36%                  | 0.943 | 0.551   |
| Protein(g)      | 414           | 2392        | 14.75%                  | 417          | 1972        | 17.46%                  | 0.863 | 0.094   |
| Fat(g)          | 381           | 2463        | 13.40%                  | 450          | 1901        | 19.14%                  | 0.794 | 0.009   |
| Carbohydrate(g) | 665           | 3479        | 16.05%                  | 166          | 885         | 15.79%                  | 0.94  | 0.577   |
| Ca(mg)          | 108           | 543         | 16.59%                  | 723          | 3821        | 15.91%                  | 0.954 | 0.715   |
| P(mg)           | 603           | 3198        | 15.86%                  | 228          | 1166        | 16.36%                  | 0.971 | 0.77    |
| Fe(mg)          | 83            | 464         | 15.17%                  | 748          | 3900        | 16.09%                  | 1.226 | 0.115   |
| K(mg)           | 110           | 498         | 18.09%                  | 721          | 3866        | 15.72%                  | 0.901 | 0.466   |
| Vit.A (R.E.)    | 155           | 744         | 17.24%                  | 676          | 3620        | 15.74%                  | 1.075 | 0.517   |
| Sodium (mg)     | 517           | 2613        | 16.52%                  | 314          | 1751        | 15.21%                  | 1.017 | 0.851   |
| Vit.B1(mg)      | 119           | 722         | 14.15%                  | 712          | 3642        | 16.35%                  | 0.889 | 0.339   |
| Vit.B2(mg)      | 88            | 529         | 14.26%                  | 743          | 3835        | 16.23%                  | 0.819 | 0.15    |
| Niacin(mg)      | 312           | 1874        | 14.27%                  | 519          | 2490        | 17.25%                  | 0.843 | 0.057   |
| Vit.C(mg)       | 358           | 1901        | 15.85%                  | 473          | 2463        | 16.11%                  | 1.016 | 0.859   |
| Zinc(ug)        | 346           | 1884        | 15.52%                  | 485          | 2480        | 16.36%                  | 0.917 | 0.331   |
| Vit.B6(mg)      | 452           | 2502        | 15.30%                  | 379          | 1862        | 16.91%                  | 0.865 | 0.099   |
| Folate(ug)      | 74            | 293         | 20.16%                  | 757          | 4071        | 15.68%                  | 1.325 | 0.074   |
| Carotene(ug)    | 455           | 2404        | 15.91%                  | 376          | 1960        | 16.10%                  | 0.976 | 0.783   |
| Ash(mg)         | 156           | 750         | 17.22%                  | 675          | 3614        | 15.74%                  | 1.032 | 0.782   |
| Vit.E(mg)       | 117           | 657         | 15.12%                  | 714          | 3707        | 16.15%                  | 0.985 | 0.9     |
| Cholesterol(mg) | 111           | 605         | 15.50%                  | 720          | 3759        | 16.08%                  | 1.005 | 0.97    |

Abbreviations: NAFLD, non-alcoholic fatty liver disease; OR, odds ratio

\*In the *PNPLA3* non-risk group, the proportion of NAFLD patients was 15.99% (831/5,195).

\*\* For each nutrient, daily intake above the recommended daily value was defined as high intake and below that as low intake. The recommended daily values used in this study are presented in Supplementary Table S1.
